# Supplementary material for: Unravelling the deactivation of CuZnO-based catalysts at the industrial scale: a micro to macro scale perspective
Source: Royal Society of Chemistry journal article supplement (doi:10.1039/d4cy01323a), 2025-01-01
Supplement: d4cy01323a1.pdf [file d4cy01323a1.pdf]

## Supporting Information

### Unravelling the deactivation of CuZnO-based catalysts at industrial scale: a micro to macro scale perspective

Vera P. Santos<sup>a</sup>, Ewa Tocha<sup>b</sup>, Jin Yang<sup>c</sup>, Mark McAdon<sup>a</sup>, Carla Schmidt<sup>c</sup>, Stuart Leadley<sup>d</sup>, David Yancey<sup>a</sup>, Stefan van Bloois<sup>b</sup>, Joost Depicker<sup>b</sup>, Swati Naik<sup>a</sup>, Linh Bui<sup>e</sup>, Saurabh Bhandari<sup>e</sup>, Daniel Grohol<sup>a</sup> and David G Barton<sup>a</sup>

<sup>a</sup> Core R&D, The Dow Chemical Company, 633 Washington Street, Midland, MI 48667, USA.

<sup>b</sup> Core R&D, Dow Benelux, Herbert Döwweg, Hoek, The Netherlands

<sup>c</sup> Tech Center, The Dow Chemical Company, Lake Jackson, Texas 77566, USA

<sup>d</sup> Core R&D, Dow Silicones Belgium, Seneffe, Belgium.

<sup>e</sup> Core R&D, The Dow Chemical Company, Lake Jackson, Texas 77566, USA

KEYWORDS: ZnO, crystal growth, sublimation, CuZnO based catalysts, industrial catalyst deactivation, pressure drop

## Contents

|                                                                                                                                           |   |
|-------------------------------------------------------------------------------------------------------------------------------------------|---|
| 1. X-ray diffraction after accelerating aging in the presence of H <sub>2</sub> or H <sub>2</sub> /C <sub>2</sub> H <sub>5</sub> Cl ..... | 2 |
| 2. Evaluation of surface composition by XPS .....                                                                                         | 4 |
| 3. Thermochemical analyses .....                                                                                                          | 4 |
| 4. Stereomicroscopy .....                                                                                                                 | 5 |
| 5. Scanning electron microscopy (SEM) .....                                                                                               | 6 |
| 6. Temperatures of melting and mobility.....                                                                                              | 8 |
| 7. X-ray Fluorescence (XRF) .....                                                                                                         | 9 |

1. X-ray diffraction after accelerating aging in the presence of  $H_2$  or  $H_2/C_2H_5Cl$

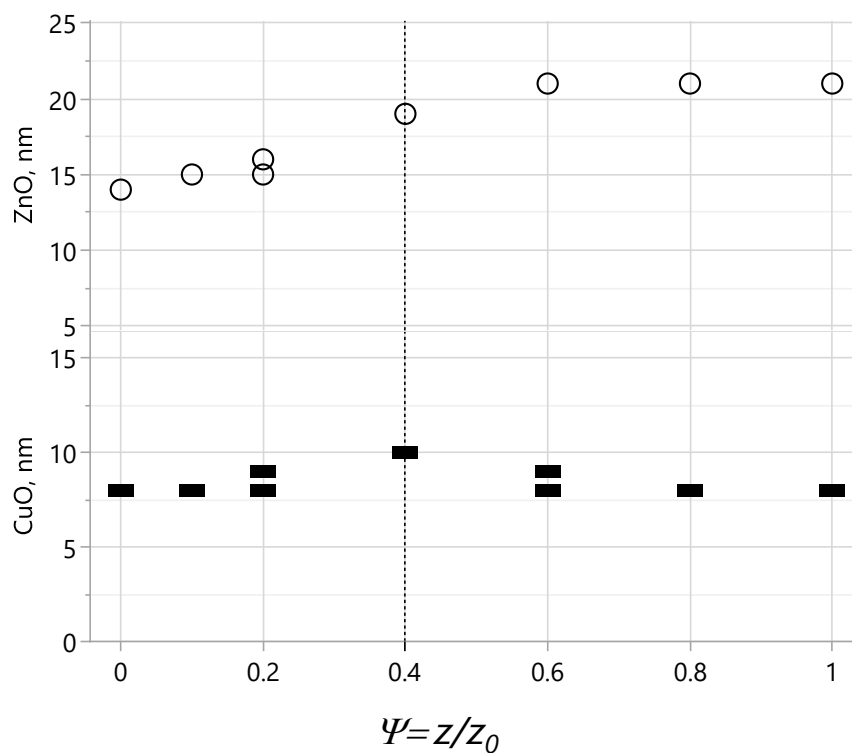

**Figure S1** Crystal domain size determined by XRD on spent catalysts as a function of catalyst bed position ( $\Psi=z/z_0$ ), where the inlet and outlet are  $\Psi=1$  and  $\Psi=0$ , respectively. Fresh catalyst showed a crystal domain size  $\sim 11$  nm for ZnO.

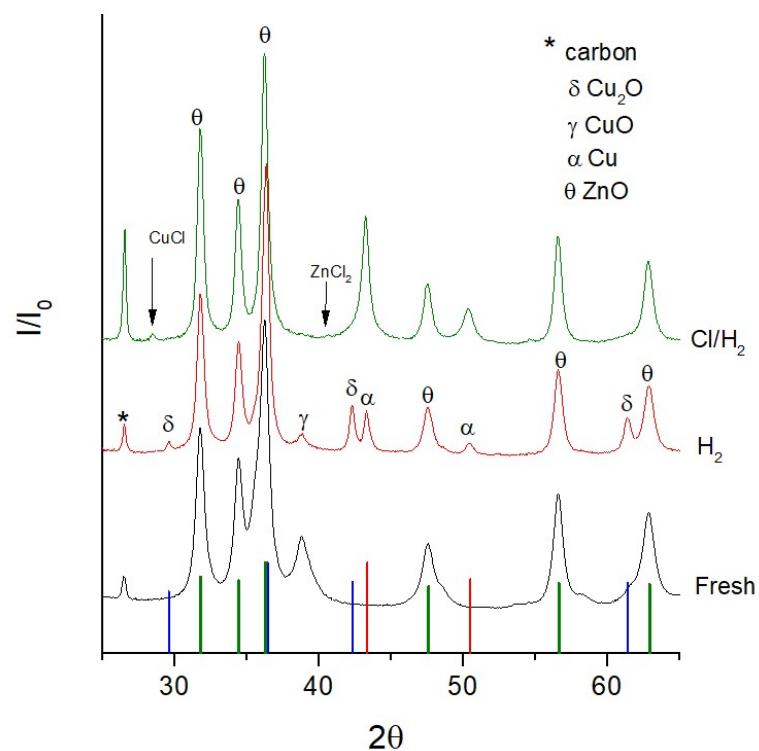

**Figure S2** X-ray diffraction lines for fresh,  $\text{H}_2$  treatment (7 days, 270 °C, 10%  $\text{H}_2/\text{inert}$ ) and after chloride treatment (7 days, 270 °C, 10%  $\text{H}_2/10 \text{ ppm } \text{C}_2\text{H}_5\text{Cl}/\text{inert}$ ).

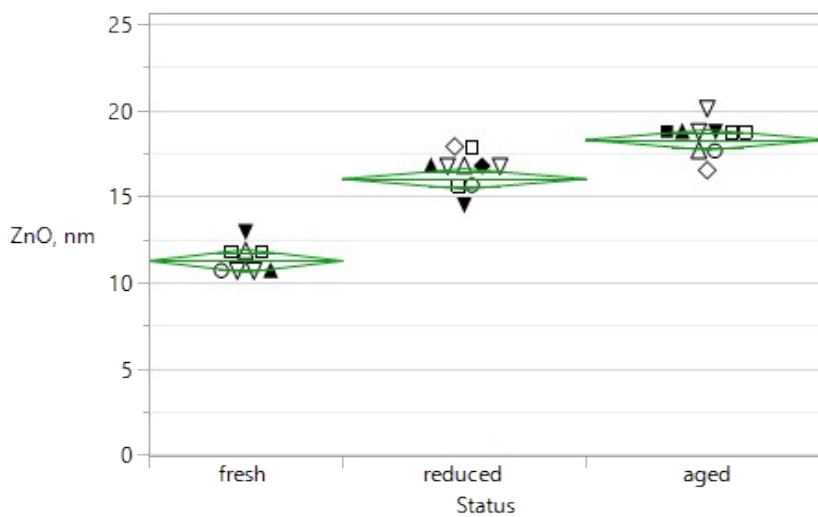

**Figure S3** Crystal domain size determined by Scherrer equation for  $\text{ZnO}$  on as received, reduced and chloride treated samples (aged samples with chloride in the feed).

## 2. Evaluation of surface composition by XPS

Surface elemental compositions were determined by X-ray photoelectron spectroscopy (XPS) for the catalyst pellets aged with ethyl chloride (7 days, 270 °C, 10% H<sub>2</sub>, 20 ppmv C<sub>2</sub>H<sub>5</sub>Cl, nitrogen (balance)). The results are shown in Table S1.

**Table S1** Surface elemental composition of catalyst pellets (surface side of the pellet) exposed to chlorine (relative atomic percentages  $\pm$  standard deviation).

| CuZnO batch                  | Zn            | Cu            | Cl            | Zn/Cu           | Cl/ (Zn+Cu) |
|------------------------------|---------------|---------------|---------------|-----------------|-------------|
| 1                            | 6.4 $\pm$ 2.7 | 9.3 $\pm$ 1.2 | 1.7 $\pm$ 0.3 | 0.69 $\pm$ 0.38 | 0.108       |
| 2                            | 8.3 $\pm$ 1.6 | 5.5 $\pm$ 1.7 | 1.4 $\pm$ 0.1 | 1.51 $\pm$ 0.89 | 0.101       |
| 3                            | 4.0 $\pm$ 1.4 | 5.7 $\pm$ 1.2 | 1.0 $\pm$ 0.1 | 0.70 $\pm$ 0.40 | 0.103       |
|                              |               |               |               |                 |             |
| relative std dev (3 batches) | 35%           | 31%           | 26%           | 49%             | 3%          |

## 3. Thermochemical analyses

Chloride is a known catalyst poison for these copper zinc oxide catalysts. Reactions of ethyl chloride are outlined below, where the values of  $\Delta H_{rx}$  and  $\Delta S_{rx}$  are determined from tabulated standard state enthalpies and entropies of formation, respectively (at 298 K or 25 °C). The  $\Delta H/\Delta S$  ratios are a reliable estimate of the temperatures at which the reactions are at thermodynamic equilibrium. The three reactions are all favorable thermodynamically under commercial operations (160-240 °C).

**Table S2** Thermodynamic analysis

| reaction                                                                                                                                           | $\Delta H/\Delta S$ (°C) | $\Delta H_{rx}$<br>(kJ/mol) | $\Delta S_{rx}$<br>(J/mol·K) |
|----------------------------------------------------------------------------------------------------------------------------------------------------|--------------------------|-----------------------------|------------------------------|
| $2 \text{ Cu} + 2 \text{ C}_2\text{H}_5\text{Cl(g)} \rightarrow 2 \text{ CuCl} + 2 \text{ C}_2\text{H}_4\text{(g)} + \text{H}_2\text{(g)}$         | 150                      | 53.5                        | 126                          |
| $\text{Cu}_2\text{O} + 2 \text{ C}_2\text{H}_5\text{Cl(g)} \rightarrow 2 \text{ CuCl} + 2 \text{ C}_2\text{H}_4\text{(g)} + \text{H}_2\text{O(g)}$ |                          | -17.6                       | 159                          |
| $\text{ZnO} + 2 \text{ C}_2\text{H}_5\text{Cl(g)} \rightarrow \text{ZnCl}_2 + 2 \text{ C}_2\text{H}_4\text{(g)} + \text{H}_2\text{O(g)}$           | -112                     | 23.2                        | 144                          |

#### 4. Stereomicroscopy

a). Fresh

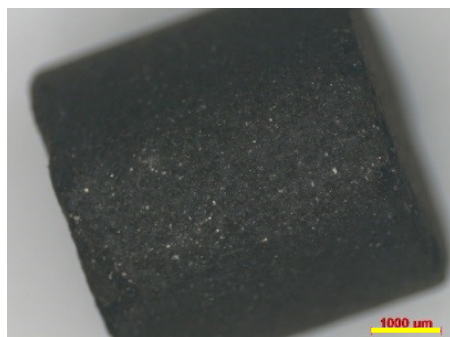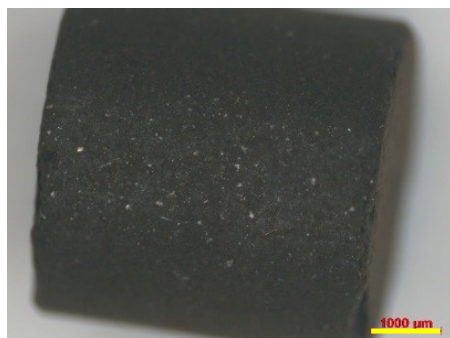

b). H<sub>2</sub>-treatment

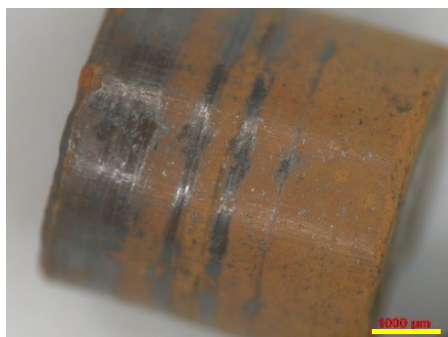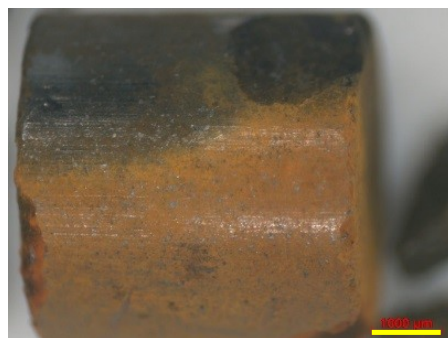

c). Cl treatment

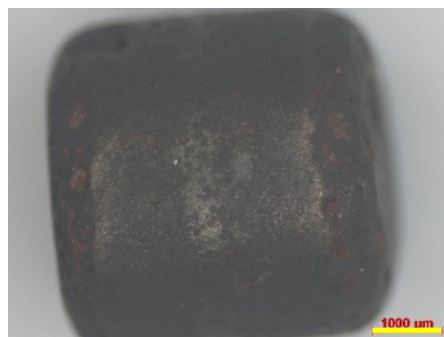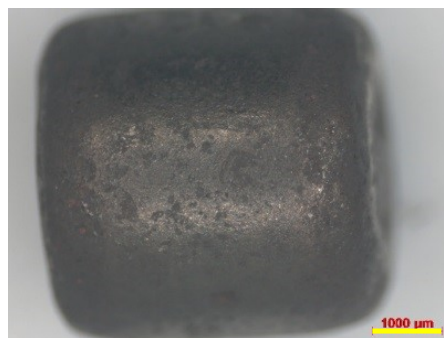

d). Spent

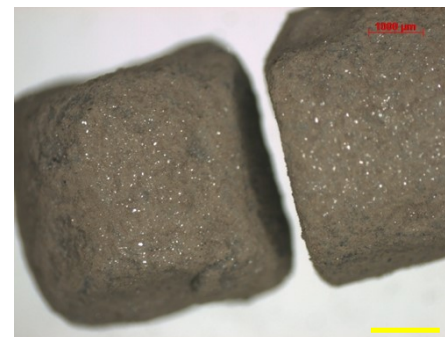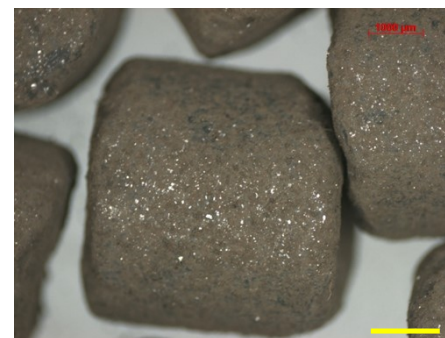

The scale bar represents 1000μm

**Figure S4** Stereomicroscopy of selected pellets correspondent to batch 1 (first row) and batch 2 (second row) on a) fresh, b) after H<sub>2</sub> treatment, c) Cl treatment and d) spent catalyst.

## 5. Scanning electron microscopy (SEM)

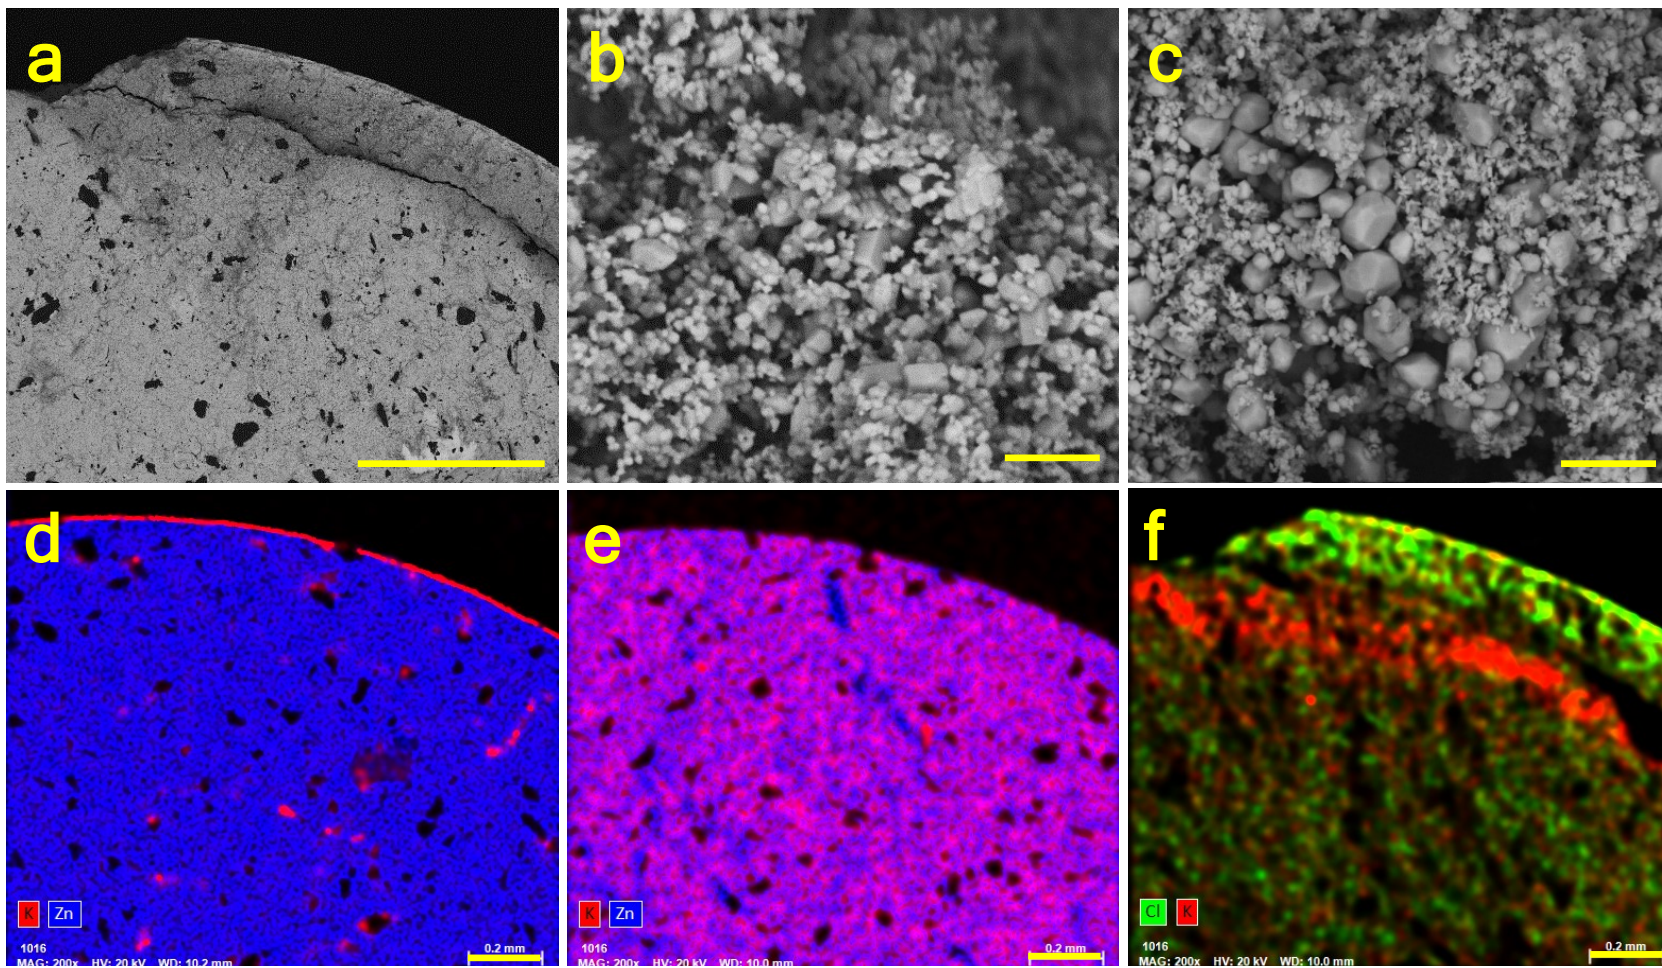

**Figure S5.** Morphology (a) and (b) after  $\text{Cl}_2$  treatment, (c) spent. Scale bar represents (a) 500  $\mu\text{m}$ , (b) and (c) 1  $\mu\text{m}$ . Elemental maps of K (red) and Zn (blue) for (d) fresh and (e)  $\text{H}_2$  treatment, (f) K (red) and Cl (green) distribution after aging with Cl. The scale bar represents 200  $\mu\text{m}$ .

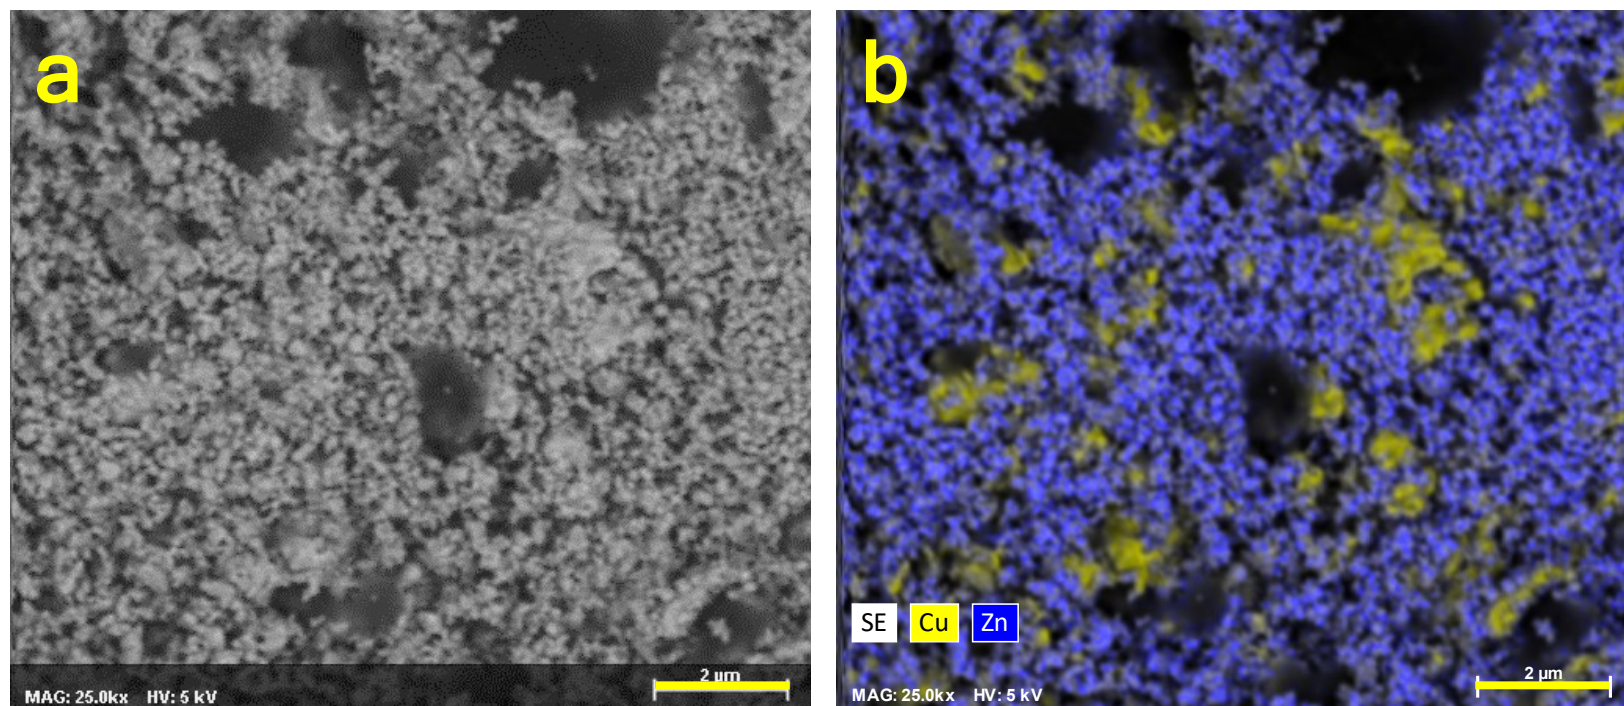

**Figure S6** (a) SEM micrograph and (b) EDS map showing Cu and Zn element distribution after Cl-treatment experiment. The scale bar represents 2  $\mu\text{m}$ .

## 6. Temperatures of melting and mobility

The temperatures of melting, bulk mobility (Tammann) and surface mobility (Hüttig) are given in the figure below. The temperatures for bulk and surface mobility are taken as  $T_{\text{melt}}/2$  and  $T_{\text{melt}}/3$ , respectively. This analysis points to high mobility for the metal chlorides. As a result, chloride impurities can accelerate the sintering that leads to the weakening of the catalyst pellets, and subsequent early termination of the useful life of the catalyst.

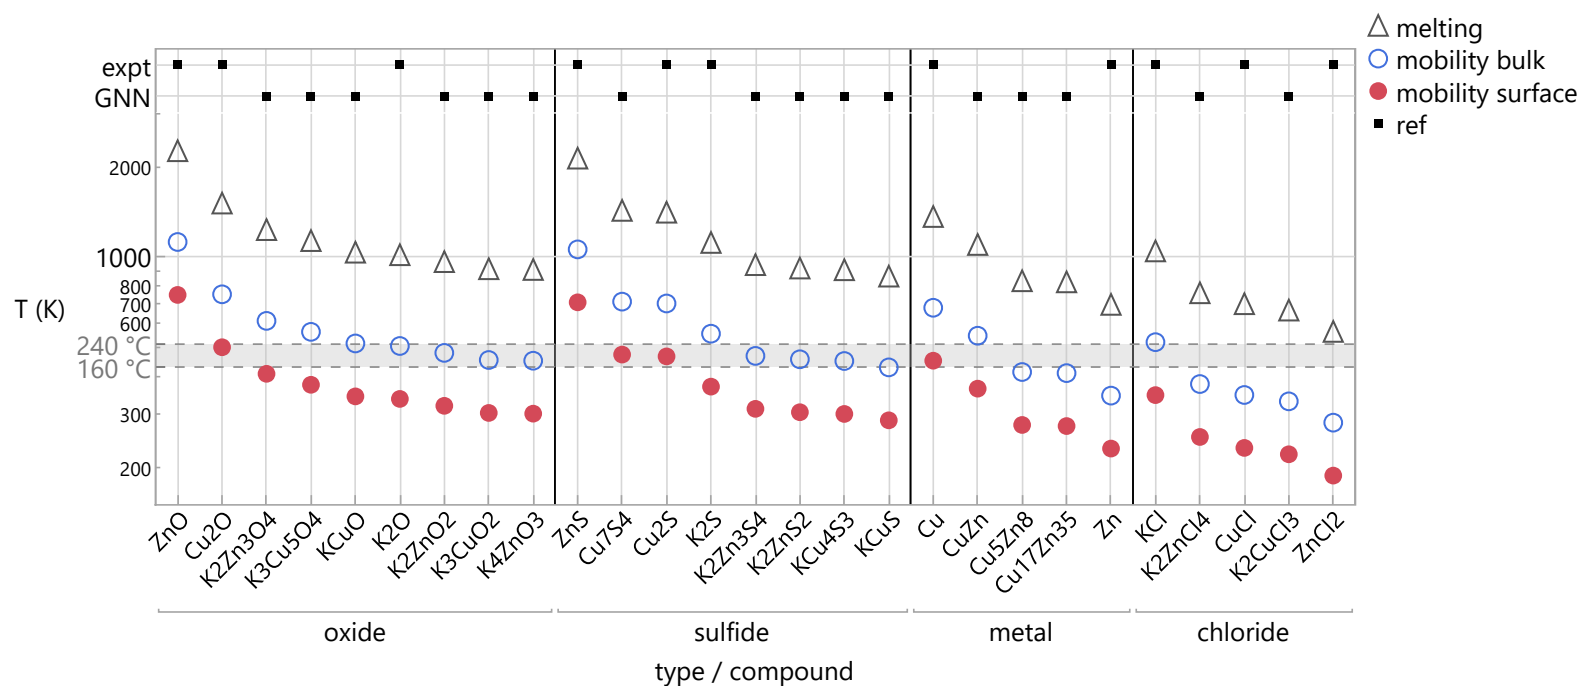

**Figure S7.** Temperatures of melting, bulk mobility, and surface mobility. Of the 27 compounds, data is from experiment for 11 and a GNN model for the other 16. The GNN model is implemented at [https://next-gen.materialsproject.org/contribs/projects/melting\\_points](https://next-gen.materialsproject.org/contribs/projects/melting_points), as described by Alexandra Navrotsky et al., [Melting temperature prediction using a graph neural network model: From ancient minerals to new materials | PNAS](#).

## 7. X-ray Fluorescence (XRF)

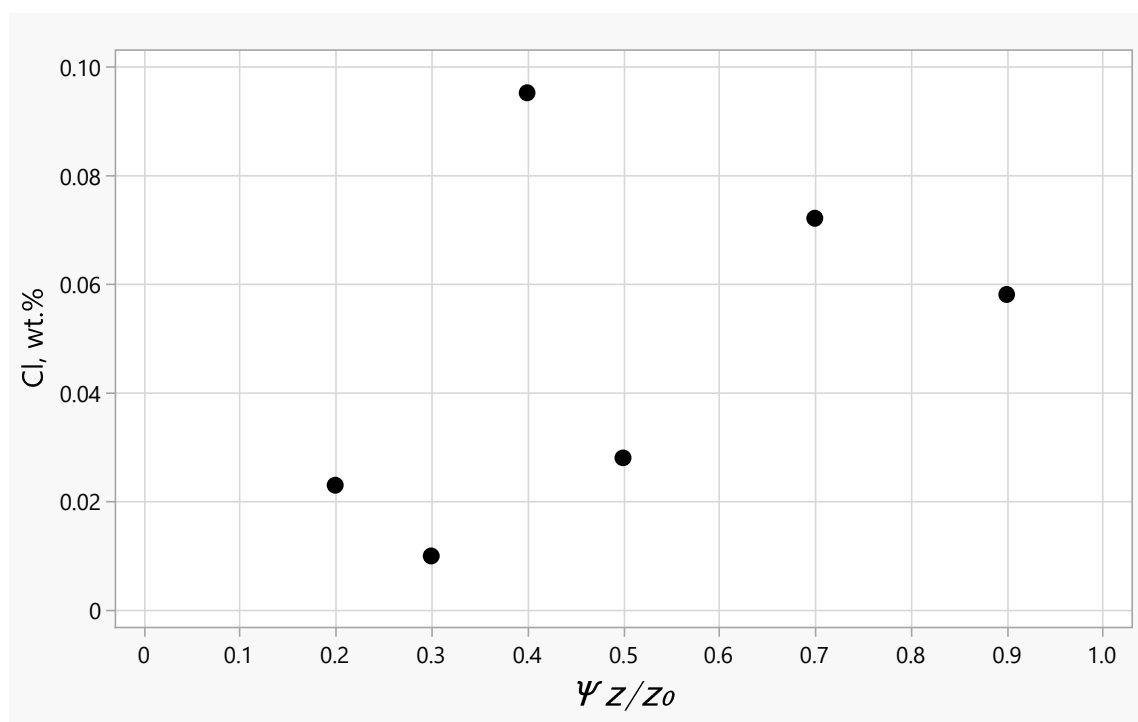

**Figure S8** Chlorine impurity level determined by XRF on spent catalyst fines as a function of catalyst bed position ( $\Psi=z/z_0$ ), where the inlet and outlet are  $\Psi=1$  and  $\Psi=0$ , respectively.
